# Supplementary material for: Construct validity of a global scale for Workplace Social Capital based on COPSOQ III
Source: PubMed Central journal article supplement (PMC6715184; doi:10.1371/journal.pone.0221893), 2019-08-29
Supplement: pone.0221893.s003.pdf [file pone.0221893.s003.pdf]

**Appendix 3. Fit to the Rasch model, summary fit statistics, n=1316.**

|               |                    | Item residual |      | Person residual |      | Chi square |         | Unidimensionality |                 |
|---------------|--------------------|---------------|------|-----------------|------|------------|---------|-------------------|-----------------|
| Analysis name |                    | Mean          | SD   | Mean            | SD   | Value      | p       | PSI               | Test % (95% CI) |
| 1             | SocCap, 6 items    | -0.77         | 3.04 | -0.52           | 1.20 | 141.5      | <0.0001 | 0.81              | 6.0 (4.9;7.5)   |
| 2             | SocCap, 2 testlets | -0.02         | 1.30 | -0.52           | 0.79 | 32         | 0.02    | 0.76              | 4.7 (3.7;6.0)   |
|               | Ideal values       | 0.0           | <1.4 | 0.0             | <1.4 |            | >0.05   | >0.7              | (LCI <5%)       |

Abbreviations. SD=Standard deviation, PSI= Person Separation Index, SocCap= Workplace Social Capital scale of the COPSOQ III.
